# Supplementary material for: Morphisms of reaction networks that couple structure to function
Source: PubMed Central journal article supplement (PMC4236760; doi:10.1186/1752-0509-8-84), 2014-08-15
Supplement: 1752-0509-8-84-S2.pdf [file 1752-0509-8-84-S2.pdf]

## Additional File 2: Examples of network morphisms

See text around Figure 6 for an explanation of the graphical notation. Solid arrows (  ) indicate emulation.

**Ex.1:** A simple stoichiomorphism, that is, species in the source reactions are distinct:

$$(S, R) = (\{s_0, s_1, s_2, s_3\}, \{r_0 = s_0 \rightarrow^k s_1, r_1 = s_2 \rightarrow^k s_3\})$$

$$(\hat{S}, \hat{R}) = (\{\hat{s}_0, \hat{s}_1\}, \{\hat{r}_0 = \hat{s}_0 \rightarrow^k \hat{s}_1\})$$

$$m(s_0) = m(s_2) = \hat{s}_0; m(s_1) = m(s_3) = \hat{s}_1; m(r_0) = m(r_1) = \hat{r}_0$$

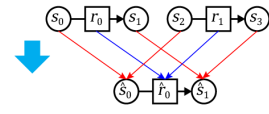

**Ex.2:** A homomorphism that is not a stoichiomorphism:

$$(S, R) = (\{s_0, s_1, s_2\}, \{r_0 = s_0 \rightarrow^k s_1, r_1 = s_0 \rightarrow^k s_2\})$$

$$(\hat{S}, \hat{R}) = (\{\hat{s}_0, \hat{s}_1\}, \{\hat{r}_0 = \hat{s}_0 \rightarrow^k \hat{s}_1\})$$

$$m(s_0) = \hat{s}_0; m(s_1) = m(s_2) = \hat{s}_1; m(r_0) = m(r_1) = \hat{r}_0$$

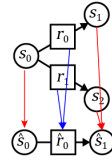

Because for  $s_0, \hat{r}_0$ :  $\sum_{r \in m^{-1}(\hat{r}_0)} \varphi(s_0, r) = -2k \neq -1k = \varphi(m(s_0), \hat{r}_0)$ .

A stoichiomorphism that is not a homomorphism or a reactant morphism:

$$(S, R) = (\{s_0, s_1, s_2\}, \{r_0 = s_0 \rightarrow^k s_1, r_1 = s_0 \rightarrow^k s_2\})$$

$$(\hat{S}, \hat{R}) = (\{\hat{s}_0, \hat{s}_1\}, \{\hat{r}_0 = \hat{s}_0 + \hat{s}_0 \rightarrow^k \hat{s}_1\})$$

$$m(s_0) = \hat{s}_0; m(s_1) = m(s_2) = \hat{s}_1; m(r_0) = m(r_1) = \hat{r}_0$$

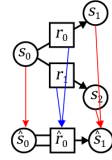

Another homomorphism that is not a stoichiomorphism:

$$(S, R) = (\{s_0, s_1, s_2\}, \{r_0 = s_0 \rightarrow^k s_1 + s_2\})$$

$$(\hat{S}, \hat{R}) = (\{\hat{s}_0, \hat{s}_1\}, \{\hat{r}_0 = \hat{s}_0 \rightarrow^k \hat{s}_1 + \hat{s}_1\})$$

$$m(s_0) = \hat{s}_0; m(s_1) = m(s_2) = \hat{s}_1; m(r_0) = \hat{r}_0$$

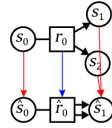

Because for  $s_1, \hat{r}_0$ :  $\sum_{r \in m^{-1}(\hat{r}_0)} \varphi(s_1, r) = k \neq 2k = \varphi(m(s_0), \hat{r}_0)$ .

A stoichiomorphism that is not a homomorphisms, but is a reactant morphism:

$$(S, R) = (\{s_0, s_1, s_2\}, \{r_0 = s_0 \rightarrow^k s_1 + s_2\})$$

$$(\hat{S}, \hat{R}) = (\{\hat{s}_0, \hat{s}_1\}, \{\hat{r}_0 = \hat{s}_0 \rightarrow^k \hat{s}_1\})$$

$$m(s_0) = \hat{s}_0; m(s_1) = m(s_2) = \hat{s}_1; m(r_0) = \hat{r}_0$$

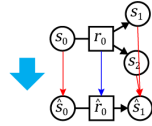

Another stoichiomorphism that is not a homomorphisms but is a reactant morphism:

$$(S, R) = (\{s_0, s_1, s_2\}, \{r_0 = s_0 \rightarrow^k s_1 + s_1, r_1 = s_0 \rightarrow^k s_2 + s_2\})$$

$$(\hat{S}, \hat{R}) = (\{\hat{s}_0, \hat{s}_1\}, \{\hat{r}_0 = \hat{s}_0 \rightarrow^{2k} \hat{s}_1\})$$

$$m(s_0) = \hat{s}_0; m(s_1) = m(s_2) = \hat{s}_1; m(r_0) = m(r_1) = \hat{r}_0$$

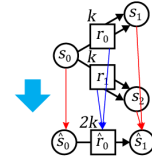

**Ex.3:** A stoichiomorphism that is not surjective on species or reactions, and not completely trivial because  $\hat{s}_0$  occurs in  $\hat{r}_1$ , so an 'extra' reaction uses a 'non-extra' species:

$$(S, R) = (\{s_0\}, \{r_0 = s_0 \rightarrow^k \})$$

$$(\hat{S}, \hat{R}) = (\{\hat{s}_0, \hat{s}_1\}, \{\hat{r}_0 = \hat{s}_0 \rightarrow^k, \hat{r}_1 = \hat{s}_0 + \hat{s}_1 \rightarrow^k \hat{s}_0\})$$

$$m(s_0) = \hat{s}_0; m(r_0) = \hat{r}_0$$

$$m^{-1}(\hat{r}_1) = \emptyset, \sum_{r \in m^{-1}(\hat{r}_1)} \varphi(s_0, r) = 0 = \varphi(\hat{s}_0, \hat{r}_1)$$

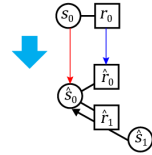

**Ex.4:** A homomorphism and stoichiomorphism that is not injective.

$$(S, R) = (\{s_0, s_1, s_2\}, \{r_0 = s_0 \rightarrow^k s_0 + s_1, r_1 = s_0 \rightarrow^k s_0 + s_2\})$$

$$(\hat{S}, \hat{R}) = (\{\hat{s}_0, \hat{s}_1\}, \{\hat{r}_0 = \hat{s}_0 \rightarrow^k \hat{s}_0 + \hat{s}_1\})$$

$$m(s_0) = \hat{s}_0; m(s_1) = m(s_2) = \hat{s}_1; m(r_0) = m(r_1) = \hat{r}_0$$

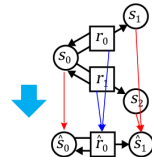

**Ex.5:** A homomorphism and stoichiomorphism that is not injective on species in the same reaction. If we remove  $r_1$  it is still a homomorphism but no longer a stoichiomorphism.

$$(S, R) = (\{s_0, s_1, s_2, s_3\}, \{r_0 = s_0 + s_1 \rightarrow^k s_2, r_1 = s_0 + s_1 \rightarrow^k s_3\})$$

$$(\hat{S}, \hat{R}) = (\{\hat{s}_0, \hat{s}_1\}, \{\hat{r}_0 = 2 \cdot \hat{s}_0 \rightarrow^k \hat{s}_1\})$$

$$m(s_0) = m(s_1) = \hat{s}_0; m(s_2) = m(s_3) = \hat{s}_1; m(r_0) = m(r_1) = \hat{r}_0$$

$$\sum_{r \in m^{-1}(\hat{r}_0)} \varphi(s_0, r) = -2k = \varphi(\hat{s}_0, \hat{r}_0)$$

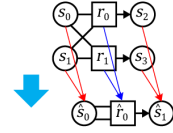

**Ex.6:** Here  $m$  fails to be a stoichiomorphism, when attempting to map a non-loop onto a loop of reactions.

$$(S, R) = (\{s_0, s_1, s_2, s_3\}, \{r_0 = s_0 \rightarrow^k s_1, r_1 = s_3 \rightarrow^k s_2\})$$

$$(\hat{S}, \hat{R}) = (\{\hat{s}_0, \hat{s}_1\}, \{\hat{r}_0 = \hat{s}_0 \rightarrow^k \hat{s}_1, \hat{r}_1 = \hat{s}_1 \rightarrow^k \hat{s}_0\})$$

$$m(s_0) = m(s_2) = \hat{s}_0; m(s_1) = m(s_3) = \hat{s}_1; m(r_0) = \hat{r}_0; m(r_1) = \hat{r}_1$$

$$\text{Because for } s_0, \hat{r}_1: \sum_{r \in m^{-1}(\hat{r}_1)} \varphi(s_0, r) = \varphi(s_0, r_1) = 0 \neq 1k = \varphi(\hat{s}_0, \hat{r}_1) = \varphi(m(s_0), \hat{r}_1).$$

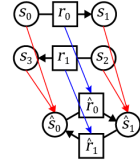

**Ex.7:** Similarly  $m$  fails to be a stoichiomorphism when mapping a catalysis to an autocatalysis.

$$(S, R) = (\{s_0, s_1, s_2\}, \{r_0 = s_0 + s_1 \rightarrow^k s_1 + s_2\})$$

$$(\hat{S}, \hat{R}) = (\{\hat{s}_0, \hat{s}_1\}, \{\hat{r}_0 = \hat{s}_0 + \hat{s}_1 \rightarrow^k \hat{s}_1 + \hat{s}_1\})$$

$$m(s_0) = \hat{s}_0; m(s_1) = m(s_2) = \hat{s}_1; m(r_0) = \hat{r}_0$$

$$\text{Because for } s_1, \hat{r}_0: \sum_{r \in m^{-1}(\hat{r}_0)} \varphi(s_1, r) = \varphi(s_1, r_0) = 0 \neq 1k = \varphi(\hat{s}_1, \hat{r}_0) = \varphi(m(s_1), \hat{r}_0).$$

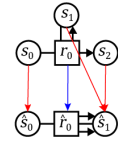

**Ex.8:** But  $m$  is a stoichiomorphism when mapping mutual catalysis to autocatalysis:

$$(S, R) = (\{s_0, s_1, s_2, s_3\}, \{r_0 = s_0 + s_3 \rightarrow^k s_3 + s_1, r_1 = s_2 + s_1 \rightarrow^k s_1 + s_3\})$$

$$(\hat{S}, \hat{R}) = (\{\hat{s}_0, \hat{s}_1\}, \{\hat{r}_0 = \hat{s}_0 + \hat{s}_1 \rightarrow^k \hat{s}_1 + \hat{s}_1\})$$

$$m(s_0) = m(s_2) = \hat{s}_0; m(s_1) = m(s_3) = \hat{s}_1; m(r_0) = m(r_1) = \hat{r}_0$$

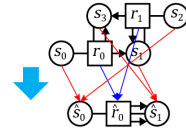

For similar examples, consider cycles of unimolecular reactions: a cycle of length 2 can be mapped by a stoichiomorphism to a cycle of length 1, and a cycle of length 4 (but not of length 3) can be mapped on a cycle of length 2.

**Ex.9:** An important way in which a homomorphism or reactant morphism may fail to be a stoichiomorphism is due to 'reaction chaining' under the morphism. Below is a simple case, but this may easily happen for example when collapsing a 2-loop into a 1-loop as in Ex.8, but where there is also a reaction connected to just one of the loop species that gets chained to the common species under the loop collapse.

$$(S, R) = (\{s_0, s_1, s_2, s_3\}, \{r_0 = s_0 \rightarrow^k s_1, r_1 = s_2 \rightarrow^k s_3\})$$

$$(\hat{S}, \hat{R}) = (\{\hat{s}_0, \hat{s}_1, \hat{s}_2\}, \{\hat{r}_0 = \hat{s}_0 \rightarrow^k \hat{s}_1, \hat{r}_1 = \hat{s}_1 \rightarrow^k \hat{s}_2\})$$

$$m(s_0) = \hat{s}_0; m(s_1) = m(s_2) = \hat{s}_1; m(s_3) = \hat{s}_2; m(r_0) = \hat{r}_0; m(r_1) = \hat{r}_1$$

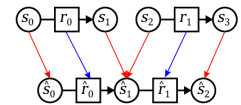

Then for  $s_2, \hat{r}_0$ :  $\sum_{r \in m^{-1}(\hat{r}_0)} \varphi(s_2, r) = \varphi(s_2, r_0) = 0 \neq 1k = \varphi(\hat{s}_1, \hat{r}_0) = \varphi(m(s_2), \hat{r}_0)$ . An even simpler, degenerate case, is as above but where there are no  $s_3, r_1, \hat{s}_2, \hat{r}_1$ , but still  $m(s_2) = \hat{s}_1$ .

**Ex.10:** A stoichiomorphism that is a reactant morphism but not a homomorphism (rates vary). It yields an emulation since concentrations of  $s_0$  and  $s_1$  decrease like  $\hat{s}_0$  from equal initial conditions.

$$(S, R) = (\{s_0, s_1\}, \{r_0 = s_0 + s_1 \rightarrow^{2k}\})$$

$$(\hat{S}, \hat{R}) = (\{\hat{s}_0\}, \{\hat{r}_0 = \hat{s}_0 + \hat{s}_0 \rightarrow^k\})$$

$$m(s_0) = m(s_1) = \hat{s}_0; m(r_0) = \hat{r}_0$$

$$\sum_{r \in m^{-1}(\hat{r}_0)} \varphi(s_0, r) = -2k = \varphi(m(s_0), \hat{r}_0)$$

$$\sum_{r \in m^{-1}(\hat{r}_0)} \varphi(s_1, r) = -2k = \varphi(m(s_1), \hat{r}_0)$$

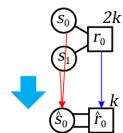

This is an example where unit rates are not sufficient. To change rates while maintaining an emulation, choose a new rate  $k'$  for  $\hat{r}_0$ . Then, according to the construction in the Change of Rates Theorem, we can choose a rate  $(2k) \cdot \frac{k'}{k} = 2k'$  for  $r_0$ , for which we still have a stoichiomorphism and an emulation over the modified networks.

**Ex.11:** Another stoichiomorphism that is a reactant morphism but not a homomorphism (rates vary). It yields an emulation since concentrations of  $s_1$ ,  $s_2$  and  $\hat{s}_1$  do not change and  $s_0$  can decrease like  $\hat{s}_0$ .

$$(S, R) = (\{s_0, s_1, s_2\}, \{r_0 = s_0 + s_1 \xrightarrow{k} s_1, r_1 = s_0 + s_2 \xrightarrow{k} s_2\})$$

$$(\hat{S}, \hat{R}) = (\{\hat{s}_0, \hat{s}_1\}, \{\hat{r}_0 = \hat{s}_0 \xrightarrow{2k} \hat{s}_1\})$$

$$m(s_0) = \hat{s}_0; m(s_1) = m(s_2) = \hat{s}_1; m(r_0) = m(r_1) = \hat{r}_0$$

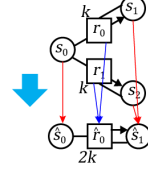

$$\sum_{r \in m^{-1}(\hat{r}_0)} \varphi(s_0, r) = -2k = \varphi(m(s_0), \hat{r}_0)$$

$$\sum_{r \in m^{-1}(\hat{r}_0)} \varphi(s_1, r) = 0 = \varphi(m(s_1), \hat{r}_0)$$

$$\sum_{r \in m^{-1}(\hat{r}_0)} \varphi(s_2, r) = 0 = \varphi(m(s_2), \hat{r}_0)$$

**Ex.12:** Examples 1, 2.4, 2.5, 3, 4, 5, 8 are further morphisms that yield emulations.

**Ex.13:** Counterexamples to the inverse of the Emulation Theorem. This statement is not true: A morphism that is a reactant morphism and an emulation is a stoichiomorphism. The counterexample is based on two distinct reactions with the same reagent; in fact, the statement above holds if the target CNR has no two reactions with the same reagents (see Additional File 5, Only-If Propositions).

$$(S, R) = (\{s_0, s_1, s_2\}, \{r_0 = s_0 \xrightarrow{k} s_1 + s_2, r_1 = s_0 \xrightarrow{k} s_2\})$$

$$(\hat{S}, \hat{R}) = (\{\hat{s}_0, \hat{s}_1, \hat{s}_2\}, \{\hat{r}_0 = \hat{s}_0 \xrightarrow{k} \hat{s}_1, \hat{r}_1 = \hat{s}_0 \xrightarrow{k} \hat{s}_2 + \hat{s}_2\})$$

$$m(s_0) = \hat{s}_0; m(s_1) = \hat{s}_1; m(s_2) = \hat{s}_2;$$

$$m(r_0) = \hat{r}_0; m(r_1) = \hat{r}_1$$

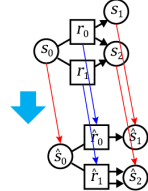

This is a reactant morphism and emulation but not stoichiomorphism for  $s_2, \hat{r}_1$  and  $s_2, \hat{r}_2$ . Moreover, requiring the reactant morphism to be a homomorphism does not help, as the following counterexample shows:

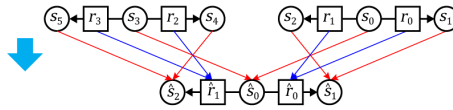

$$(S, R) = (\{s_0, s_1, s_2, s_3, s_4, s_5\}, \{r_0 = s_0 \xrightarrow{k} s_1, r_1 = s_0 \xrightarrow{k} s_2, r_2 = s_3 \xrightarrow{k} s_4, r_3 = s_3 \xrightarrow{k} s_5\})$$

$$(\hat{S}, \hat{R}) = (\{\hat{s}_0, \hat{s}_1, \hat{s}_2\}, \{\hat{r}_0 = \hat{s}_0 \xrightarrow{k} \hat{s}_1, \hat{r}_1 = \hat{s}_0 \xrightarrow{k} \hat{s}_2\})$$

$$m(s_0) = m(s_3) = \hat{s}_0; m(s_1) = m(s_2) = \hat{s}_1; m(s_4) = m(s_5) = \hat{s}_2;$$

$$m(r_0) = m(r_1) = \hat{r}_0; m(r_2) = m(r_3) = \hat{r}_1$$

This is a homomorphism and an emulation (e.g., each of  $s_0, s_3, \hat{s}_0$  decrease at rate  $-2k$ ), but not a stoichiomorphism because for  $s_0, \hat{r}_0$ :  $\sum_{r \in m^{-1}(\hat{r}_0)} \varphi(s_0, r) = -2k \neq -k = \varphi(m(s_0), \hat{r}_0)$ .

Moreover, consider the morphism over one species and one reaction such that  $m(s) = \hat{s}$  and  $m(s \xrightarrow{k} s) = 2\hat{s} \xrightarrow{k} 2\hat{s}$ . This is an emulation and a stoichiomorphism, but not a reactant morphism.

**Ex.14:** Another stoichiomorphism that is not a homomorphisms, but is a reactant morphism:

$$(S, R) = (\{s_0, s_1, s_2, s_3\}, \{r_0 = s_0 \xrightarrow{k} s_1, r_1 = s_2 \xrightarrow{k} s_3\})$$

$$(\hat{S}, \hat{R}) = (\{\hat{s}_0, \hat{s}_1, \hat{s}_2\}, \{\hat{r}_0 = \hat{s}_0 \xrightarrow{k} \hat{s}_1 + \hat{s}_2\})$$

$$m(s_0) = m(s_2) = \hat{s}_0; m(s_1) = \hat{s}_1; m(s_3) = \hat{s}_2;$$

$$m(r_0) = m(r_1) = \hat{r}_0$$

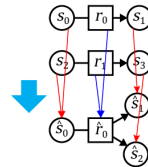

In general, there is a stoichiomorphism and reactant morphism between a tree and its set of paths.
