# Supplementary material for: Morphisms of reaction networks that couple structure to function
Source: PubMed Central journal article supplement (PMC4236760; doi:10.1186/1752-0509-8-84), 2014-08-15
Supplement: 1752-0509-8-84-S4.pdf [file 1752-0509-8-84-S4.pdf]

## Additional File 4: Steady states

It can be shown that AM and SI have each 4 steady states, and MI has an additional class of unstable steady states (bottom row). Here all rates are 1.0 and  $K$  is the total amount of each triplet of species:

| Steady states | AM                                                                                | SI                                                                                | MI                                                                                  |
|---------------|-----------------------------------------------------------------------------------|-----------------------------------------------------------------------------------|-------------------------------------------------------------------------------------|
| unstable      | $x_0 = x_1 = x_2 = K/3$                                                           | $z_0 = z_1 = z_2 = y_0 = y_1 = y_2 = K/3$                                         | $z_0 = z_1 = z_2 = y_0 = y_1 = y_2 = K/3$                                           |
| stable        | $x_0 = K, x_2 = x_1 = 0$                                                          | $z_0 = y_2 = K, z_1 = z_2 = y_0 = y_1 = 0$                                        | $z_0 = y_2 = K, z_1 = z_2 = y_0 = y_1 = 0$                                          |
| stable        | $x_2 = K, x_0 = x_1 = 0$                                                          | $z_2 = y_0 = K, z_0 = z_1 = y_1 = y_2 = 0$                                        | $z_2 = y_0 = K, z_0 = z_1 = y_1 = y_2 = 0$                                          |
| unstable      | $x_1 = K, x_2 = x_0 = 0$                                                          | $z_1 = y_1 = K, z_0 = z_2 = y_0 = y_2 = 0$                                        | $z_1 + z_2 = y_1 + y_2 = K, z_0 = y_0 = 0$                                          |
|               | 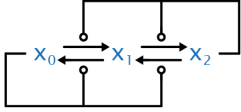 |  |  |

We can see that the steady states of AM are preserved under the species mappings shown in Figure 3 above. More generally, by the Steady State Proposition, we can infer that the bistability of AM is preserved by all the networks in Figure 3 that are connected to AM by blue arrows: for each, two specific distinct steady states can be derived from the mappings, without need to compute their steady states separately.
